# Supplementary material for: A methodology to extract outcomes from routine healthcare data for patients with locally advanced non-small cell lung cancer
Source: BMC Health Serv Res. 2018 Apr 11;18:278. doi: 10.1186/s12913-018-3029-6 (PMC5896093; doi:10.1186/s12913-018-3029-6)
Supplement: Supplementary file 2 — OPCS codes identified for primary presentation and investigation: Table listing biopsy OPCS codes, other diagnostic procedure OPCS codes, diagnostic imaging OPCS codes and RTDS indicators. (DOCX 18 kb) [file 12913_2018_3029_MOESM2_ESM.docx]

**Additional file 2. OPCS codes identified for primary presentation and investigation.**

| **Biopsy OPCS Codes** | |
| --- | --- |
| E59.1 | Needle biopsy of lesion of lung |
| E59.3 | Biopsy of lesion of lung NEC |
| T09.2 | Open biopsy of lesion of pleura |
| T12.1 | Drainage of lesion of pleura NEC |
| T12.3 | Aspiration of pleural cavity |
| T87.4 | Excision or biopsy of mediastinal lymph node |
| Y20.4 | Fine needle aspiration NOC |
| Y21.1 | Brush cytology of organ NOC |
| X55.1 | Biopsy of lesion of unspecified organ |
| **Other Diagnostic Procedure OPCS Codes** | |
| E49.2 | ϮDiagnostic fibreoptic endoscopic examination of lower respiratory tract and lavage of lesion of lower respiratory tract |
| E63.2 | ϮEndobronchial ultrasound examination of mediastinum |
| E63.9 | Unspecified diagnostic endoscopic examination of mediastinum |
| Y53.2 | Approach to organ under ultrasonic control |
| Y74.4 | Thoracoscopic video-assisted approach to thoracic cavity |
| **Diagnostic Imaging OPCS Codes** | |
| U36.2 | Positron emission tomography with computed tomography NEC |
| U26.1 | Glomerular filtration rate testing |
| U05.1 | Computed tomography of head |
| U21.2 AND Y98.3 AND Z92.4 | Computed tomography NEC -Radiology of three body areas (or 20-40 minutes)- Chest NEC |
| U21.2 AND Y98.3 AND Z92.6 | Computed tomography NEC -Radiology of three body areas (or 20-40 minutes)- Abdomen NEC |
| U21.2 AND Y98.3 AND Z75.9 | Computed tomography NEC -Radiology of three body areas (or 20-40 minutes)- Bone of pelvis NEC |
| **RTDS** | |
|  | Date of Request on booking form consent date |

NEC (not elsewhere classified).NOC (not otherwise classified). §Band numbers relating to the chemotherapy are assigned for costing purposes and do not help identify tumour type or origin, nor if the treatment is radical or palliative.
