# Supplementary material for: A methodology to extract outcomes from routine healthcare data for patients with locally advanced non-small cell lung cancer
Source: BMC Health Serv Res. 2018 Apr 11;18:278. doi: 10.1186/s12913-018-3029-6 (PMC5896093; doi:10.1186/s12913-018-3029-6)
Supplement: Supplementary file 3 — OPCS codes identifying primary management: Table listing radiotherapy OPCS codes, chemotherapy OPCS codes and interventional OPCS codes. (DOCX 17 kb) [file 12913_2018_3029_MOESM3_ESM.docx]

**Additional file 3. OPCS codes identifying primary management.**

| **Radiotherapy OPCS Codes** | |
| --- | --- |
| X65.4 | Delivery of a fraction of external beam radiotherapy NEC |
| Y92.1 | Technical support for preparation for radiotherapy |
| X67.1 | Preparation for intensity modulated radiation therapy |
| X67.7 | Preparation for complex conformal radiotherapy |
| Y91.1 | Megavoltage treatment for complex radiotherapy |
| Y91.4 | Megavoltage treatment for adaptive radiotherapy |
| **Chemotherapy OPCS Codes** | |
| Z51.1 | Chemotherapy session for neoplasm |
| X70.3 | §Procurement of drugs for chemotherapy for neoplasm for regimens in Band 3 |
| X72.1 | Delivery of complex chemotherapy for neoplasm including prolonged infusional treatment at first attendance |
| X71.5 | §Procurement of drugs for chemotherapy for neoplasm for regimens in Band 10 |
| X71.1 | §Procurement of drugs for chemotherapy for neoplasm for regimens in Band 6 |
| X70.5 | §Procurement of drugs for chemotherapy for neoplasm for regimens in Band 5 |
| **Interventional OPCS Codes** | |
| L76.9 | †Unspecified endovascular placement of stent |
| L79.3 | †Insertion of stent into vena cava NEC |

NEC (not elsewhere classified).NOC (not otherwise classified). §Band numbers relating to the chemotherapy are assigned for costing purposes and do not help identify tumour type or origin, nor if the treatment is radical or palliative. †These are interventional procedures undertaken for patients presenting with superior vena cava obstruction secondary to a locally advanced tumour in the apex of the lung).
